# Supplementary material
Source: MDPI journal article supplement (https://www.mdpi.com/2073-4344/12/12/1497)
Supplement: s1 [file s1]

## Supplementary Material

### Synthesis of Oxygenated Hydrocarbons from Ethanol over Sulfided KCoMo-Based Catalysts: Influence of Novel Fiber- and Powder-Activated Carbon Supports

Tshepo D. Dipheko <sup>1,2</sup>, Vladimir V. Maximov <sup>1</sup>, Mohamed E. Osman <sup>1,2</sup>, Oleg L. Eliseev <sup>1,\*</sup>, Alexander G. Cherednichenko <sup>2</sup>, Tatiana F. Sheshko <sup>2</sup> and Victor M. Kogan <sup>1</sup>

<sup>1</sup> N.D. Zelinsky Institute of Organic Chemistry RAS, Moscow 119991, Russia

<sup>2</sup> Peoples' Friendship University of Russia, Moscow 117198, Russia

\* Correspondence: oleg@ioc.ac.ru

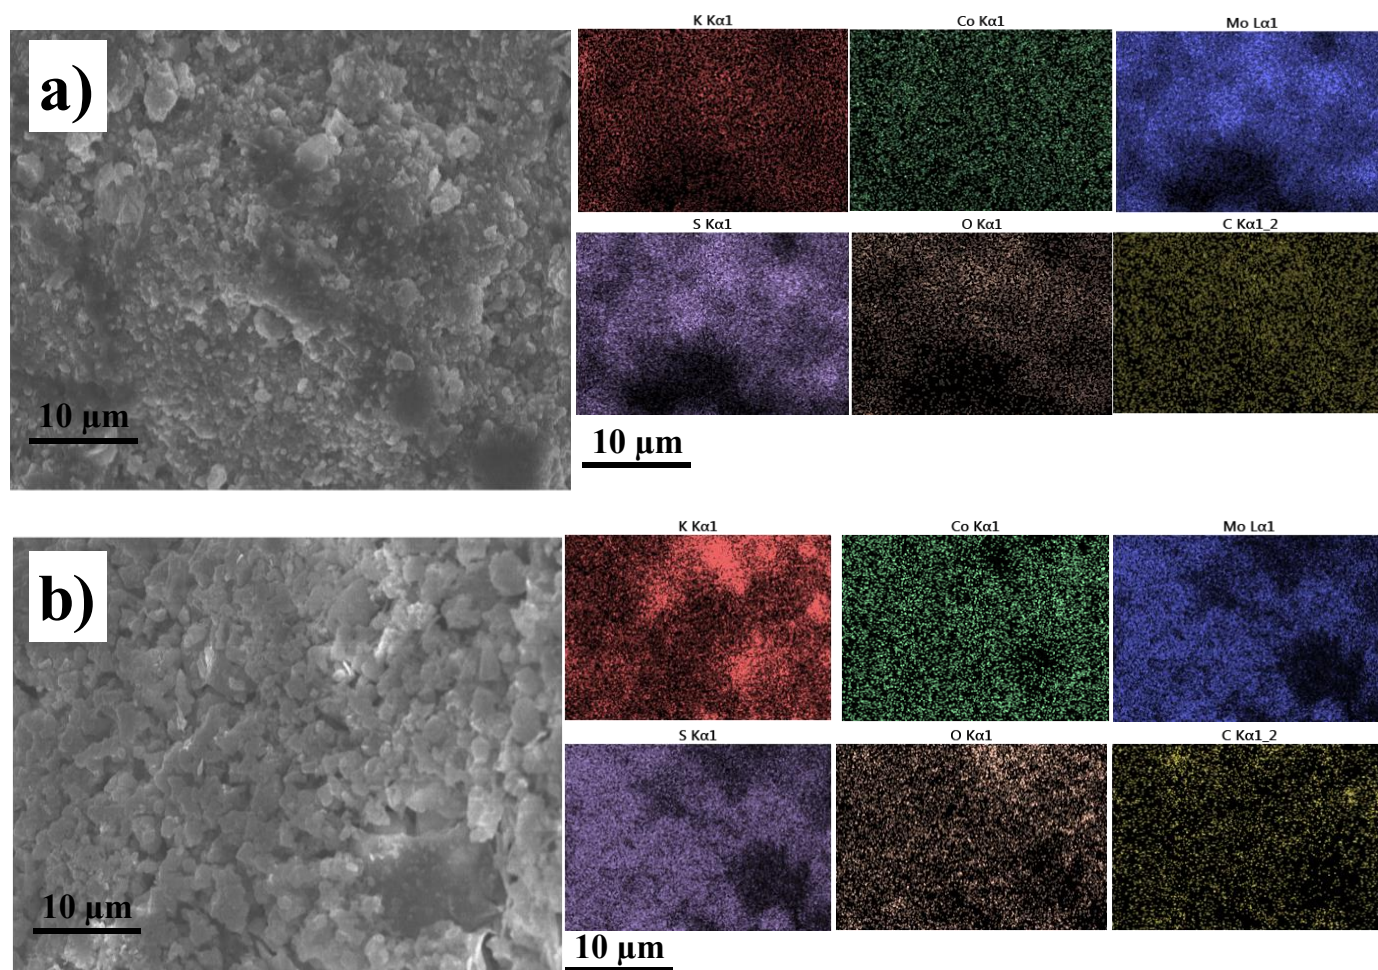

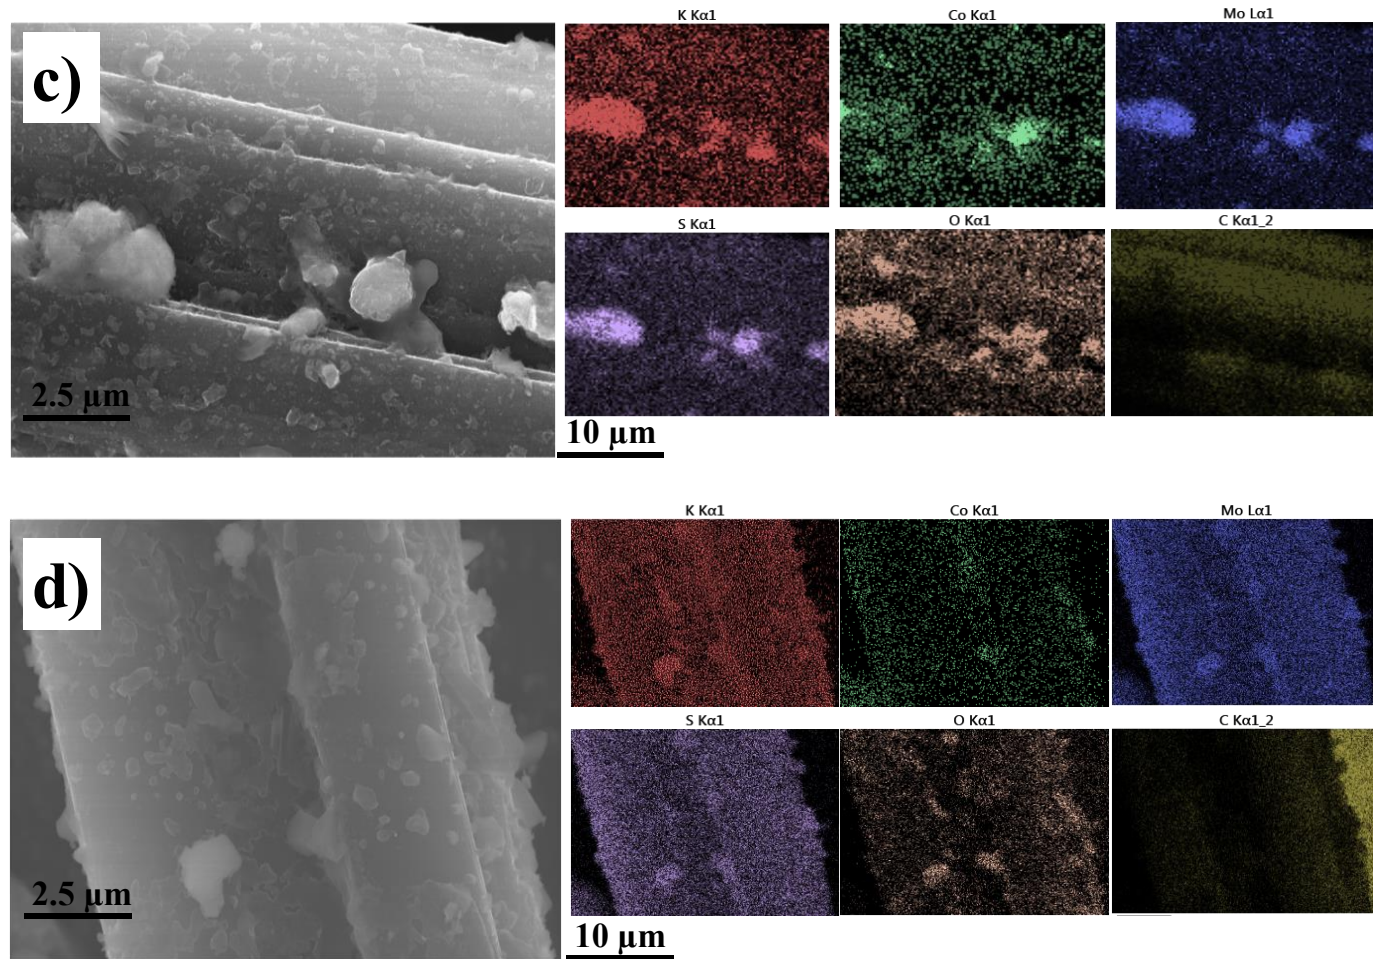

**Figure S1.** SEM/EDX spectrum mapping of KCoMoS<sub>2</sub>/DAS (a), KCoMoS<sub>2</sub>/YPK-1 (b), KCoMoS<sub>2</sub>/AHM (c) and KCoMoS<sub>2</sub>/TCA (d)
